# Supplementary material for: The Chinese longsnout catfish genome provides novel insights into the feeding preference and corresponding metabolic strategy of carnivores
Source: HighWire-hosted journal article supplement (doi:10.1101/gr.278476.123), 2024-07-01
Supplement: Supplemental_Methods.docx [file Supplemental_Methods.docx]

**Supplemental Methods**

**Genomic DNA extraction**

The muscle of a male catfish (*L. longirostris* Günther) was prepared for genomic DNA extraction. A DNAsecure Kit (TIANGEN, Beijing, China) was used to extract the genomic DNA according to the instructions. DNA was tested for degradation and contamination on a 1% agarose gel. A NanoPhotometer® spectrophotometer (IMPLEN, CA, USA) was used to check the purity of genomic DNA, and the DNA concentration was determined by a fluorometer (Life Technologies, CA, USA). The second-generation genome was sequenced using the Illumina HiSeq platform, and the third-generation genome sequencing was performed using the ONT platform (Oxford Nanopore Technologies).

**The transcriptome and the complete transcriptome for annotation of the assembled genome**

Brain, muscle, liver, kidney, heart, and spleen tissues from fish used for genomic DNA extraction were prepared for transcriptome libraries. RNA extraction from the tissues was performed according to the instructions of the TRIzol Universal Kit (TIANGEN, Beijing, China). Transcriptome libraries from the tissues were sequenced using the Illumina PE150 platform. RNA from the tissues was combined into a single sample, and a structured full-length transcriptome library was constructed. The full-length transcriptome library was sequenced using the ONT platform.

***tas1r3* knockout in zebrafish**

The gRNA targeting *tas1r3* in zebrafish was transcribed using a TranscriptAid T7 High Yield Transcription Kit (Thermo Fisher Scientific, Waltham, MA, USA). Fifty nanograms per microliter of each of the gRNAs synthesized for the two target sites were injected into embryos with Cas9 recombination protein and buffer (Nova protein, Shanghai, China). The *tas1r3* heterozygote was crossed to generate the *tas1r3* homozygous fish. Male fish from the offspring derived from heterozygotes mating at 3 mpf were genotyped, sampled, and analyzed. Genotyping examination (*tas1r3*+/+, *tas1r3*+/-, and *tas1r3*-/-) of the population was performed using genomic DNA as the template.

**Transcriptome sequencing analysis**

Total liver RNA was extracted, and 1 μg of RNA per sample was used as input material for RNA sample preparations. RNA sequencing was performed using the Illumina Nova platform (Novogene Technology Company, Tianjin, China). Raw data was assessed for quality control using FastQC (v0.11.5). Adapter sequences were removed using Trim Galore. The high-quality reads were mapped to the the *Danio rerio* genome (GRCz11) using HISAT2 (V2.2.0) with default parameters. The raw counts were summarized with feature Counts (Subread software, v 2.03). Differential expression analysis was performed using the DESeq2 R package (1.16.1). The *P*-values obtained were adjusted using the Benjamini and Hochberg approach to control the FDR. The differential expression analysis was performed with the DESeq2 package (v1.30.1) using a fold change of 2 and a *P*-value cutoff of 0.05. The ClusterProfiler R package was used to analyze the enrichment of DEGs in KEGG pathways.

**Real-time qPCR assays**

Gene expression was determined using the RT-qPCR method as described by Su et al (2020) and microRNA expression was analyzed using the method of stem-loop RT-PCR (Chen et al. 2020). The qPCR primers are listed in Supplemental Table S21. The TransStart® Tip Green qPCR SuperMix (Transgen, Beijing, China) and a Bio–Rad real-time system (BioRad Systems, Berkeley, CA, USA) were used for the amplification reaction. All relative mRNA expression levels were calculated using the 2-ΔΔCt method.

**Biochemical analysis**

Plasma total amino acid (TAA), intestinal trypsin, α-amylase, and hepatic glutamic oxaloacetic transaminase (got), glutamic pyruvic transaminase (gpt), glucokinase (GCK), and pyruvate kinase (PK) activities were determined using commercial kits following the manufacturer’s protocols (Nanjing Jiancheng Bioengineering Institute, Nanjing, China).

**miRNA target gene validation**

The miR-216b target genes were validated according to the procedure of Chen et al (2020). Briefly, the fragments of the 3’UTRs of *tas1r3* containing the putative miR-216b binding sites were cloned and subcloned at the KpnI and XhoI sites into the pGL3-Basic reporter vector (Promega). HEK293T cells were seeded in 24-well plates and co-transfected with pGL3-*tas1r3* reporter vector (0.4 μg), the miR-216b mimic (40 nM), and pTK-Renilla (0.01 μg, as an internal control) with VigoFect (Vigorous Biotechnology, China). Luciferase activity was measured 24 h after transfection using the Dual-luciferase Reporter Assay System (Promega, Madison, WI, USA).
