# Supplementary material for: The Chinese longsnout catfish genome provides novel insights into the feeding preference and corresponding metabolic strategy of carnivores
Source: HighWire-hosted journal article supplement (doi:10.1101/gr.278476.123), 2024-07-01
Supplement: Supplemental_References_.docx [file Supplemental_References_.docx]

**Supplemental References**

Chen GH, Wu K, Zhao T, Ling SC, Liu W, Luo Z. 2020. miR-144 mediates high fat–induced changes of cholesterol metabolism via direct regulation of C/EBPα in the liver and isolated hepatocytes of yellow catfish. *J Nutr* **150:** 464–474. doi:10.1093/jn/nxz282

Su JZ, Gong YL, Mei LY, Xi LW, Chi SY, Yang YX, Jin JY, Liu HK, Zhu XM, Xie SQ, et al. 2020. The characteristics of glucose homoeostasis in grass carp and Chinese longsnout catfish after oral starch administration: a comparative study between herbivorous and carnivorous species of fish. *Br J Nutr* **123:** 627–641. doi:10.1017/S0007114519003234
