# Supplementary material for: The Chinese longsnout catfish genome provides novel insights into the feeding preference and corresponding metabolic strategy of carnivores
Source: HighWire-hosted journal article supplement (doi:10.1101/gr.278476.123), 2024-07-01
Supplement: Supplemental_Table_S10.docx [file Supplemental_Table_S10.docx]

# Supplemental Table S10. Clustering of gene families in different species.

| **Scientific name** | **Gene number** | **Family number** | **Unique family** | **Single copy family** |
| --- | --- | --- | --- | --- |
| *Leiocassis longirostris* Günther | 23550 | 15755 | 65 | 183 |
| *Pelteobagrus fulvidraco* | 24552 | 14907 | 186 | 183 |
| *Ictalurus punctatus* | 23731 | 16285 | 57 | 183 |
| *Danio rerio* | 30980 | 16605 | 169 | 183 |
| *Ctenopharyngodon idellus* | 24938 | 16672 | 12 | 183 |
| *Megalobrama amblycephala* | 29551 | 17372 | 88 | 183 |
| *Micropterus salmoides* | 25724 | 16460 | 94 | 183 |
| *Cyprinus carpio* | 41961 | 17148 | 103 | 183 |
| *Oncorhynchus mykiss* | 41385 | 17004 | 407 | 183 |
| *Acipenser ruthenus* | 37505 | 16457 | 725 | 183 |
| *Homo sapiens* | 22022 | 15588 | 224 | 183 |
| *Mus musculus* | 20235 | 15130 | 132 | 183 |
| *Epinephelus lanceolatus* | 23384 | 16405 | 48 | 183 |
